# Supplementary material for: DNA watermarks in non-coding regulatory sequences
Source: PubMed Central journal article supplement (PMC2713970; doi:10.1186/1756-0500-2-125), 2009-07-07
Supplement: 1756-0500-2-125-S1.pdf [file 1756-0500-2-125-S1.pdf]

Table 1

| <i>promoter</i> | <i>sequence</i>                                                                     |
|-----------------|-------------------------------------------------------------------------------------|
| lac             | TAGCTCACTCATTAGGCACCCCAGGCTTT <b>ACACTTT</b> ATGCTTCCGGCTCG <b>TATGTT</b> GTGTGGAAT |
| hexokinase      | AAT <b>TAGCAT</b> ATTTCTGTTGAGTGGCTGDDGAGGAGGGTGGAGCTTGGCCCTGAGCT <b>TCACTTCTG</b>  |
| AD4             | TTTTTTTTGTGTGAG <b>TAATATGCAAATAAGG</b> CGTGAAAATTTGGGGAT                           |
| H2B             | GTCGGTCCGCTGCGATGCG <b>TATGCAAAT</b> GTTAGCCATTCAGGGGGGATT                          |
| AD2             | TATTTTGGATTGAAGCCA <b>ATATGATAATGAGGGGGGGT</b> GGAGTTTGTGACG                        |
| SV40            | GCTCCCAGCAGGCAGA <b>AGTATGCAAAGCATGCATCTCAATTAGTCAGC</b>                            |
